# Supplementary material for: How the Replication and Transcription Complex Functions in Jumping Transcription of SARS-CoV-2
Source: Front Genet. 2022 May 30;13:904513. doi: 10.3389/fgene.2022.904513 (PMC9191571; doi:10.3389/fgene.2022.904513)
Supplement: Supplementary file 1 [file Table1.XLSX]

## Sheet: s1
			Read on the antisense strands of the SARS-CoV-2 genome (GenBank: MN908947.3), “AAGAA” (in blue color) and “GUUCGU” (in red color) represent RNA methylation sites and NSP15 cleavage sites, respectively.
																																																N	N
																																																N	N
																																		G		A
										A	A	C																					C				A
									U				A																			A						C
										U	-	A																				A						A
										G	-	C																				A						A
													U																				U				U
										U	-	A																						C	-	G
										U	-	A																									U
									C																									A	-	U
										U	-	A																						A	-	U
									U																									C	-	G
										G	-	C																						A	-	U
N	N	N	N	N	N	N	N	N	N	U	*	G	N	N	N	N	N	N	N	N	N	N		N	N	N	N	N	N	N	N	N	N	A	-	U	N	N	N	N	N	N	N	N	N	N		N	N
											S																								S
N	N	N	N	N	N	N	N	N	A	C	-	G	C	U	U	G	N	N	N	N	N	N		A	C	A	A	G	A	A	C	A	A	U	-	A	A	A	A	G	A	A	N	N	N	N		N	N
									A																									U	-	A
										A	-	U																						G	-	C
									G																									U	-	A
										A	-	U																						U	-	A
										A	-	U																									A
													A																					G	-	C
										C	-	G																									A
										A	-	U																						A	-	U
									A				U																				U				U
										U	U	G																					U				G
																																	U				U
																																		G	C	U
										A		C
									C				A																					G		A
										A	-	U																					C				A
													A																				A				C
										U	-	A																						A	-	U
										U	-	A																						A	-	U
									A				C																					U	-	A
										C	-	G																						A	-	U
									A																									C	-	G
										U	-	A																					A
N	N	N	N	N	N	N	N	N	N	U	-	A	N	N	N	N	N	N	N	N	N	N		N	N	N	N	N	N	N	N	N	N	C	-	G	N	N	N	N	N	N	N	N	N	N		N	N
									ORF3a																								ORF3a
N	N	N	N	N	N	N	N	N	N	A	-	U	G	N	N	N	N	N	N	N	N	N		N	N	N	N	N	N	N	N	N	N	G	-	C	N	N	N	N	N	N	N	N	N	N		N	N
										A	-	U																					U
									U																									G	-	C
										G	-	C																						U	-	A
										U	*	G																						A	-	U
										A	-	U																						U	-	A
										A	-	U																						U	-	A
													U																				U				G
										U	-	A																					G				U
									G				U																					C		U
										U		G
										A	G	C
									A				U
										C	-	G
													A
										A	-	U
										C	-	G
									G				A																					C		G
									A				G																				A				A
										A	-	U																						U	-	A
										U	-	A																						G	-	C
										G	-	C																						A	-	U
										U	*	G																						G	*	U
										U	-	A																						U	-	A
N	N	N	N	N	N	N	N	N	N	U	-	A	N	N	N	N	N	N	N	N	N	N		N	N	N	N	N	N	N	N	N	N	A	-	U	N	N	N	N	N	N	N	N	N	N		N	N
											E																								E
N	N	N	N	N	N	N	N	N	N	A	-	U	G	N	N	N	N	N	N	N	N	N		N	N	N	N	N	N	N	N	N	N	U	-	A	N	N	N	N	N	N	N	N	N	N		N	N
										A	-	U																						A	-	U
									A				C																				C				A
										C	-	G																						U	-	A
										A	-	U																						C	-	G
										U	-	A																						A	-	U
									U				C																				U				U
									C				U																					G		C
										G	-	C
										U	-	A
													U
										G	-	C
									U				A
										U	C	G
										A	U	C
									G				U
									U				U
									C				C																					A	A	C
									C				U																				A				G
										U	*	G																						U	-	A
										U	*	G																					C
									G																									U	-	A
										A	-	U																						G	-	C
										G	-	C																						G	*	U
										A	-	U																						U	-	A
										U	-	A																					C
									C																									U	-	A
										U	-	A																						U	-	A
										U	-	A																					C				U
													C																					U	-	A
										C	-	G																						A	-	U
										U	-	A																						G	*	U
N	N	N	N	N	N	N	N	N	N	U	-	A	N	N	N	N	N	N	N	N	N	N		N	N	N	N	N	N	N	N	N	N	U	-	A	N	N	N	N	N	N	N	N	N	N		N	N
											M																								M
N	N	N	N	N	N	N	N	N	N	A	-	U	G	N	N	N	N	N	N	N	N	N		N	N	N	N	N	N	N	N	A	C	U	-	A	A	U	N	N	N	N	N	N	N	N		N	N
										A	-	U																						A	-	U
										G	-	C																					G				A
													G																					A	-	U
										A	-	U																						A	-	U
										A	-	U																					G
									G																									A	-	U
										A	-	U																					C				A
										U	-	A																						C	-	G
										C	-	G																						A	-	U
										U	-	A																					G
									C				C																					A	-	U
									A				C																				U				C
									A				A																					U	U	G
									G				G
									G				A
									A				A
									C				G
										U		A
										C		A
									A				U
									U				C																					U	C	A
									C				A																				A				C
										G	-	C																						C	-	G
													G																				A				A
										U	-	A																						U	-	A
										U	-	A																									C
										G	-	C																						C	-	G
N	N	N	N	N	N	N	N	N	N	U	*	G	N	N	N	N	N	N	N	N	N	N		N	N	N	N	N	N	N	N	N	N	G	-	C	N	N	N	N	N	N	N	N	N	N		N	N
									ORF6																								ORF6
N	N	N	N	N	N	N	N	N	A	C	-	G	C	N	N	N	N	N	N	N	N	N		N	N	N	N	N	N	N	N	N	N	C	-	G	A	A	A	G	A	A	N	N	N	N		N	N
										A	-	U																						G	-	C
										A	-	U																									G
													C																					A	-	U
										C	-	G																					U				U
										G	*	U																						G	-	C
									A				G																				U				G
									U				A																					A	G	U
										G		U
																																		A		C
										G		A																					A				G
									G				G																				A				A
										U	-	A																						U	-	A
										A	-	U																									C
										A	-	U																						U	-	A
										C	-	G																						A	-	U
									C				A																				G				G
										A	-	U																						U	-	A
N	N	N	N	N	N	N	N	N	N	A	-	U	N	N	N	N	N	N	N	N	N	N		N	N	N	N	N	N	N	N	N	N	U	-	A	N	N	N	N	N	N	N	N	N	N		N	N
									ORF7a																								ORF7a
N	N	N	N	N	N	N	N	N	N	U	-	A	U	U	U	G	C	U	U	G	N	N		N	N	N	N	N	N	N	N	N	N	A	-	U	U	UA	A	A	U	A	A	G	A	A		N	N
										U	-	A																						A	-	U
										G	*	U																					C				C
										G	-	C																						U	-	A
										U	-	A																						A	-	U
										U	-	A																									G
										A	-	U																						A	-	U
									C				C																				U				U
										C		U																					U				C
																																		U		G
																																		A	A	A
																																	U				C
										A		A																						C	-	G
									G				A																				C				A
									U				C																								A
										A	-	U																						G	-	C
										A	-	U																					C				A
										U	*	G																						A	-	U
										A	-	U																						C	-	G
									C				C																					U	-	A
										U	-	A																					G
									A																									U	-	A
N	N	N	N	N	N	N	N	N	N	G	-	C	N	N	N	N	N	N	N	N	N	N		N	N	N	N	N	N	N	N	N	N	U	-	A	N	N	N	N	N	N	N	N	N	N		N	N
									ORF8																								ORF8
N	N	N	N	N	N	N	N	N	N	C	-	G	C	G	G	A	U	U	U	G	C	U		N	N	N	N	N	N	N	N	N	N	A	-	U	A	A	A	G	A	A	N	N	N	N		N	N
									U																									A	-	U
										A	-	U																					C
									G				G																					A	-	U
										U	-	A																						G	-	C
									A				C																					U	-	A
										U	-	A																						G	*	U
										U	-	A																						C	-	G
									A				G																								U
									C				U																					G	*	U
										U		U																						G	-	C
																																	A				G
																																		U	U	U
																																		A	A	A
																																	U				C
																																		C	-	G
																																		U	-	A
																																	A				A
										U	U	C																					C				C
									U				A																					U	-	A
										A	-	U																						U	-	A
										G	-	C																						U	-	A
										A	-	U																					A
									U																									G	-	C
										U	-	A																						A	-	U
										U	-	A																						U	-	A
										U	-	A																						U	-	A
										G	-	C																						U	-	A
										U	*	G																						U	-	A
										U	-	A																						G	*	U
													A																					U	*	G
										G	-	C																					U				U
N	N	N	N	N	N	N	N	N	N	U	-	A	N	N	N	N	N	N	N	N	N	N		N	N	N	N	N	N	N	N	N	N	G	-	C	N	N	N	N	N	N	N	N	N	N		N	N
											N																								N
N	N	N	N	N	N	N	N	N	N	A	-	U	N	N	N	N	N	N	N	N	N	N		N	N	N	N	N	N	C	A	A	C	A	-	U	A	C	A	G	N	N	N	N	N	N		N	N
										C	-	G																						A	-	U
													U																					A	-	U
										A	-	U																						A	-	U
									A				C																					U	-	A
										C	-	G																						C	-	G
										A	-	U																					U
										A	-	U																						A	-	U
										A	-	U																						A	-	U
									A																									A	-	U
										U	-	A																									G
										C	-	G																						G	*	U
										U	-	A																					U
									A				U																					A	-	U
										A	A	G																						G	-	C
																																	A				G
																																		U	U	U
																																		A		C
																																	N				G
																																	N				U
																																		N		A
																																		c		G
																																		g		U
																																				G
																																		g		U
																																				A
																																		c		G
																								N	N	N	N	N	N	N	N	N	N	u		C	U	A	G	U	C	A	A	N	N	N		N	N
																											12-nt insertion
																								N	N	N	N	N	N	N	N	N	N			G	N	N	N	N	N	N	N	N	N	N		N	N
																																				C
																																				U
																																				A
																																				C
																																				A
																																				C
																																		N		U
																																	N				A
																																	N				C
																																		U		G
																																		U		C
																																	G				A
																																	A				A
																																	U				U
																																	C				C
																																		G	-	C
																																					A
																																		A	-	U
																																	U
																																		G	-	C
																																		U	-	A
																																		G	*	U
																																		A	-	U
																																		U	*	G
																								N	N	N	N	N	N	N	N	N	N	G	-	C	N	N	N	N	N	N	N	N	N	N		N	N
																													30-nt deletion
																								N	N	N	N	N	N	N	N	N	N	C	-	G	N	N	N	N	N	N	N	N	N	N		N	N
																																	A				C
																																		U	-	A
																																	C				A
																																		A	-	U
																																		C	-	G
																																	A
																																		U	-	A
																																					U
																																		C	-	G
																																	G				G
																																	A				A
																																	U				U
																																	C				U
																																		A		G
																																		C	G	U
																																	A				U
																																		G	-	C
																																		U	*	G
																																		A	-	U
																																		C	-	G
																																	U				U
																																		A	-	U
																																		U	*	G
																																		G	*	U
																																		A	-	U
																																		G	*	U
																																		A	-	U
																																		U	-	A
																																		U	*	G
																								N	N	N	N	N	N	N	N	N	N	U	-	A	N	N	N	N	N	N	N	N	N	N		N	N
																												382-nt deletion
																								A	A	A	U	C	U	C	A	U	A	G	-	C	A	A	C	A	A	A	A	U	C	U		N	N
																																		U	-	A
																																	A				C
																																		C	-	G
																																	U				A
																																		G	C	A
																																		A		A
																																	C				G
																																		U	-	A
																																		U	-	A
																																		G	-	C
																																		A	-	U
																																		A	-	U
																																		G	*	U
																																					A
																																		G	-	C
																																		A	-	U
																																		G	-	C
																								N	N	N	N	N	N	N	N	N	N	A	-	U	N	N	N	N	N	N	N	N	N	N		N	N
																												134-nt deletion
																								N	N	N	N	N	N	N	N	N	N	U	-	A	G	G	U	U	A	A	A	A	G	A		N	N
																																		C	-	G
																																		U	-	A
																																		C	-	G
																																					U
																																	C				A
																																		U	-	A
																																		U	-	A
																																		C	-	G
																																		A	-	U
																																		A	-	U
																																	G				C
																																		U		U
																																		U	A	A
																																	A				G
																																		U	*	G
																																		A	-	U
																																	A				A
																																		G	-	C
																																	G				A
																																		U	-	A
																																	A				C
																																	A				A
																																		G	-	C
																																					U
																																		U	-	A
																																		C	-	G
																								N	N	N	N	N	N	N	N	N	N	C	-	G	N	N	N	N	N	N	N	N	N	N		N	N
																												29-nt deletion
																								N	N	N	N	N	N	N	N	N	N	G	-	C	N	N	N	N	N	N	N	N	N	N		N	N
																																		G	-	C
																																		A	-	U
																																					A
																																		C	-	G
																																	U				U
																																	U				G
																																		A	-	U
																																	C				U
																																		C	-	G
																																	U				U
																																		U	-	A
																																	A				C
																																	U				C
																																		A	U	U
																																		C		G
																																	U				C
																																	G				A
																																		C	-	G
																																		G	-	C
																																	A				G
																																		G	*	U
																																					G
																																		G	*	U
																																					A
																																	A				G
																																		U	*	G
																																					C
																																		U	-	A
																																	A				C
																																	A
																																		A	-	U
																																		C	-	G
																																					A
																																		A	-	U
																																	U				U
																																					C
																								N	N	N	N	N	N	N	N	N	N	U	-	A	N	N	N	N	N	N	N	N	N	N		N	N
																								N	N	N	N	N	N	N	N	N	N	A	-	U	N	N	N	N	N	N	N	N	N	N		N	N
																																					G
																																	A				A
																																		U	-	A
																																					U
																																		G	-	C
																																		U	-	A
																																		U	*	G
																																	U
																																		A	-	U
																																	A
																																		U	*	G
																																	C				C
																																	C				C
																																					U
																																		U	-	A
																																	C
																																		G	-	C
																																	C
																																		U	-	A
																																		G	-	C
																																	C				G
																																		G	U	C
[truncated: 44 more columns]
